# Supplementary material for: Patterns and Factors Associated with Self-Medication among the Pediatric Population in Romania
Source: MDPI journal article supplement (doi:10.3390/medicina56060312), 2020-06-25
Supplement: s1 [file s1]

Dear Madam/Sir

We invite you to take part in a survey regarding the attitudes and behaviours of parents toward the administration of medical treatments.

The data collected in this study will be used for publications in scientific journals, in research reports and in a doctoral thesis. We mention that we do NOT request personal data (name, address, phone number) and our study has complied with the Romanian legislation (Law 190/2018) and GDPR - The General Data Protection Regulation 679/2016.

Your answers are anonymous and confidential. We ensure the confidentiality of the answers.

Completing this online study is voluntary and it takes approximately 15-20 minutes.

If there are any reasons you are unable to complete the questionnaire, you may withdraw.

By clicking on the button below, you confirm your participation in this study, but also the fact that you are at least 18 years old and that you have voluntarily chosen to complete the questionnaire.

*I agree to answer to the questionnaire.*

*I do not agree; I do not want to participate in this research.*

1. Your age:

-----

2. Sex \*

Male

Female

3. Marital status: \*

Married

Single

Divorced

Widow

4. Studies \*

Without school

General school

High school - Bachelor's degree

Post-secondary studies

Higher education

Doctoral / postgraduate studies

Vocational school

5. Do you currently have a job? \*

Yes

No

6. Your working schedule is: \*

Full time (8h)

Half-time (part time-4h)

Special program (work from home)

7. How many children do you have? \*

1 child

- 2 children
- 3 or more than 3 children

8. How often have you been treating your children without your doctor's advice?

- Often
- Sometimes
- Never

9. In the last 6 months, how many times your child has had a health problem:

- Never
- Once
- 2-3 times
- 4-5 times
- More than 5 times

10. To what extent do you resort to the following situations when the child is ill:

|                                                                          | To a large extent        | To a small extent        | Never                    |
|--------------------------------------------------------------------------|--------------------------|--------------------------|--------------------------|
| Go to the hospital                                                       | <input type="checkbox"/> | <input type="checkbox"/> | <input type="checkbox"/> |
| Call the known paediatric telephone lines                                | <input type="checkbox"/> | <input type="checkbox"/> | <input type="checkbox"/> |
| Get in touch with a trusted acquaintance                                 | <input type="checkbox"/> | <input type="checkbox"/> | <input type="checkbox"/> |
| Call your child's paediatrician / family doctor                          | <input type="checkbox"/> | <input type="checkbox"/> | <input type="checkbox"/> |
| Give medicine to your child                                              | <input type="checkbox"/> | <input type="checkbox"/> | <input type="checkbox"/> |
| Give phytoterapies                                                       | <input type="checkbox"/> | <input type="checkbox"/> | <input type="checkbox"/> |
| Give homeopathic remedies                                                | <input type="checkbox"/> | <input type="checkbox"/> | <input type="checkbox"/> |
| Search on Google                                                         | <input type="checkbox"/> | <input type="checkbox"/> | <input type="checkbox"/> |
| Search only on trusted medical online sources                            | <input type="checkbox"/> | <input type="checkbox"/> | <input type="checkbox"/> |
| Resume the previous treatments/ schemes / prescriptions from your doctor | <input type="checkbox"/> | <input type="checkbox"/> | <input type="checkbox"/> |
| Ask about treatment on online parenting groups                           | <input type="checkbox"/> | <input type="checkbox"/> | <input type="checkbox"/> |

11. What are the situations in which you deal with your child's problem alone?

- Fever
- Cough
- Vomiting
- Abdominal pain
- Diarrhoea
- Minor trauma

Other. Which?.....

12. What medicines do you give to your child when dealing with his or her health problem?

Analgesics

Antipyretics (paracetamol, ibuprofen etc.)

Antibiotics

Antitussive

Antidiarrheal

Other. Which?.....

13. From what age of your child have you managed alone certain health problems?

Less than 6 months

6-12 months

13-24 months

After 24 months

14. How do you get the drugs used in your child's health problems?

Immediately from the pharmacy

You call on an acquaintance / relative / friend

You use the previous prescriptions

15. When and to what extent do you decide to treat alone your child in the following situations?

|                                         | To a large extent        | To a small extent        | Never                    |
|-----------------------------------------|--------------------------|--------------------------|--------------------------|
| At the end of the week                  | <input type="checkbox"/> | <input type="checkbox"/> | <input type="checkbox"/> |
| When you are out of town                | <input type="checkbox"/> | <input type="checkbox"/> | <input type="checkbox"/> |
| During the night                        | <input type="checkbox"/> | <input type="checkbox"/> | <input type="checkbox"/> |
| When you cannot access medical services | <input type="checkbox"/> | <input type="checkbox"/> | <input type="checkbox"/> |

16. When do you decide to self-administer medications to your child?

When the first symptoms appear

When you recognize the symptoms of a previous illness

When the child's condition worsens

17. The medication information you obtain from:

Mass media (TV, newspapers, magazines, etc.)

Friends

Pharmacist

Doctor

Google / Internet search

Online groups of parents from forums and social media

Specialized medical sites  
Other

18. Do you think you are exposing your child to a risk by administering medicines without medical advice?

Yes  
No

19. If yes, which of the following situations represent possible sources of risk:

Inappropriate medication  
Inappropriate dose  
Side effects of medicines  
Misdiagnosis of severe illnesses  
Delayed presentation to the doctor  
Drug interactions

20. To what extent do you agree with the following statements:

|                                                                                                 | Agree                    | Disagree                 | Don't know/I don't answer |
|-------------------------------------------------------------------------------------------------|--------------------------|--------------------------|---------------------------|
| Self-medication is a solution when you don't have time                                          | <input type="checkbox"/> | <input type="checkbox"/> | <input type="checkbox"/>  |
| Self-medication is more effective when the medical advice / consultation is difficult to access | <input type="checkbox"/> | <input type="checkbox"/> | <input type="checkbox"/>  |
| Self-medication is cheaper than medical consultation                                            | <input type="checkbox"/> | <input type="checkbox"/> | <input type="checkbox"/>  |
| Self-medication is allowed in case of minor health issues                                       | <input type="checkbox"/> | <input type="checkbox"/> | <input type="checkbox"/>  |

21. How often have you searched for health information on the Internet?

Always  
Often  
Rare  
Never

22. How often have you read the following on the Internet?

|                                                                        | Always                   | Often                    | Rarely                   | Never                    |
|------------------------------------------------------------------------|--------------------------|--------------------------|--------------------------|--------------------------|
| Treatment of certain paediatric diseases                               | <input type="checkbox"/> | <input type="checkbox"/> | <input type="checkbox"/> | <input type="checkbox"/> |
| Symptoms related to specific diseases                                  | <input type="checkbox"/> | <input type="checkbox"/> | <input type="checkbox"/> | <input type="checkbox"/> |
| The stories of parents who have encountered children's health problems | <input type="checkbox"/> | <input type="checkbox"/> | <input type="checkbox"/> | <input type="checkbox"/> |
| Natural methods of treating children's diseases - phytotherapy         | <input type="checkbox"/> | <input type="checkbox"/> | <input type="checkbox"/> | <input type="checkbox"/> |
| Homeopathic remedies for treating children's diseases                  | <input type="checkbox"/> | <input type="checkbox"/> | <input type="checkbox"/> | <input type="checkbox"/> |

23. In your opinion, to what extent did the information you read on the Internet help you in your child's health problem?

To a large extent

To a small extent

I don't know / I'll not answer

24. Do you have a Facebook, Instagram, Twitter account?

Yes

Not

25. Are you a member of an online medical discussion group?

Yes

Not
